# Supplementary material for: Cachrys spp. from Southern Italy: Phytochemical Characterization and JAK/STAT Signaling Pathway Inhibition
Source: MDPI journal article supplement (doi:10.3390/plants11212913), 2022-10-29
Supplement: s1 [file s1]

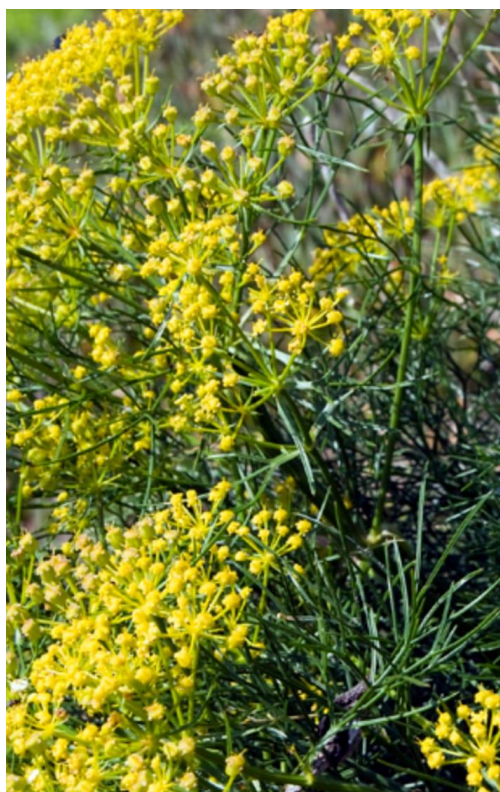

(a)

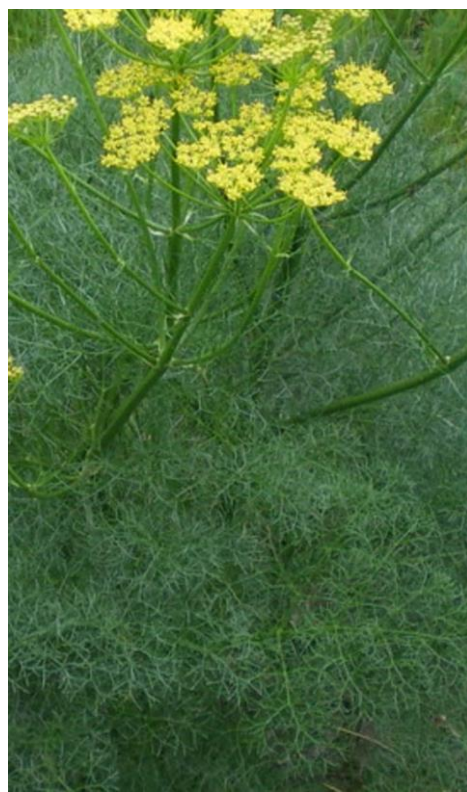

(b)

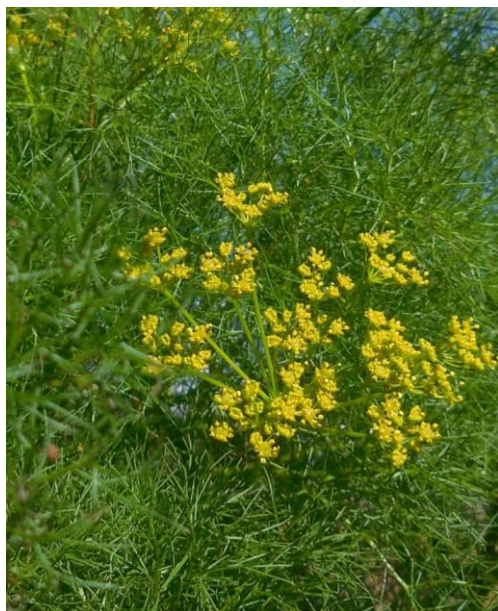

(c)

**Figure S1.** (a) *C. libanotis* L., (b) *C. ferulacea* (L.) Calest., (c) *C. pungens* Jan.

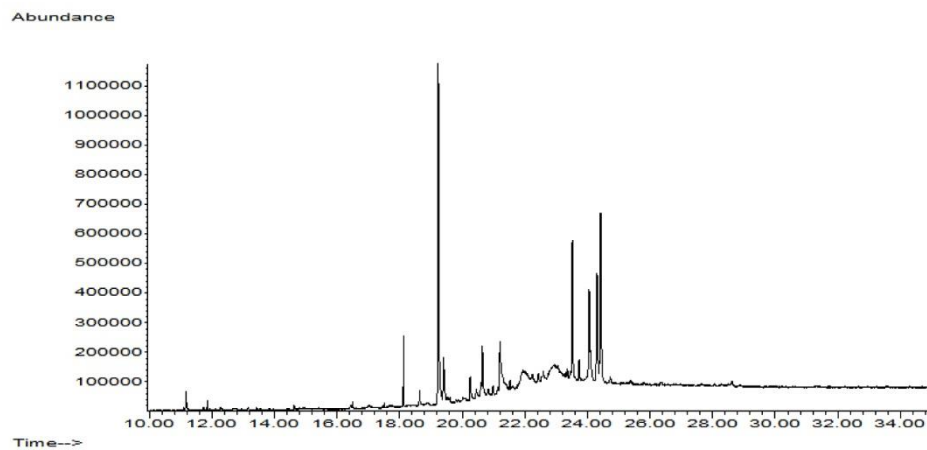

(a)

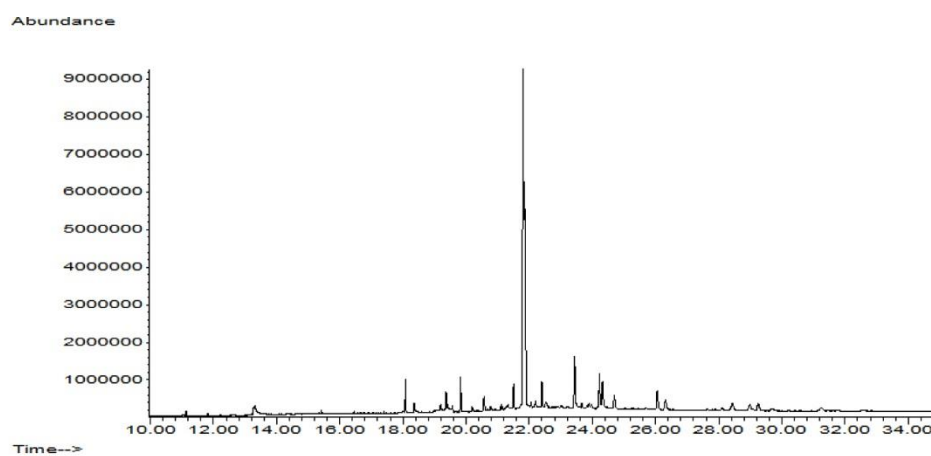

(b)

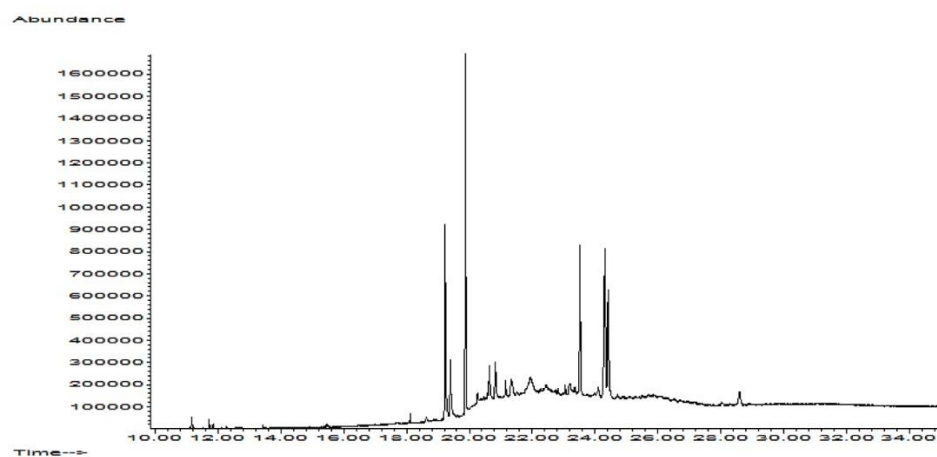

(c)

**Figure S2.** GC-MS chromatograms of (a) *C. libanotis* L., (b) *C. ferulacea* (L.) Calest., (c) *C. pungens* Jan extracts.
